# Supplementary material for: Ultrafast and simultaneous removal of four tetracyclines from aqueous solutions using waste material-derived graphene oxide-supported cobalt–iron magnetic nanocomposites
Source: Royal Society of Chemistry journal article supplement (doi:10.1039/d3ra07597d), 2024-01-01
Supplement: d3ra07597d1.pdf [file d3ra07597d1.pdf]

## Supplementary file

Ultrafast and simultaneous removal of four tetracyclines from aqueous solutions using waste material derived graphene oxide-supported cobalt-iron magnetic nanocomposites

Md. Sohag Hossain<sup>1,2</sup>, Md Humayun Kabir<sup>1\*</sup>, Md Aftab Ali Shaikh<sup>1,2\*</sup>, Md. Anamul Haque<sup>2</sup>,  
Sabina Yasmin<sup>1\*</sup>,

<sup>1</sup>Institute of National Analytical Research and Service (INARS), Bangladesh Council of Scientific and Industrial Research (BCSIR), Dhanmondi, Dhaka-1205, Bangladesh

<sup>2</sup>Department of Chemistry, University of Dhaka, Dhaka 1000, Bangladesh

\*Corresponding author e-mail: (Sabina Yasmin) [sabinayasmin@bcsir.gov.bd](mailto:sabinayasmin@bcsir.gov.bd)

\*Corresponding author e-mail: (Md Humayun Kabir) [humayunkabir@bcsir.gov.bd](mailto:humayunkabir@bcsir.gov.bd)

\*Corresponding author e-mail: (Md Aftab Ali Shaikh) [aftabshaikh@du.ac.bd](mailto:aftabshaikh@du.ac.bd)

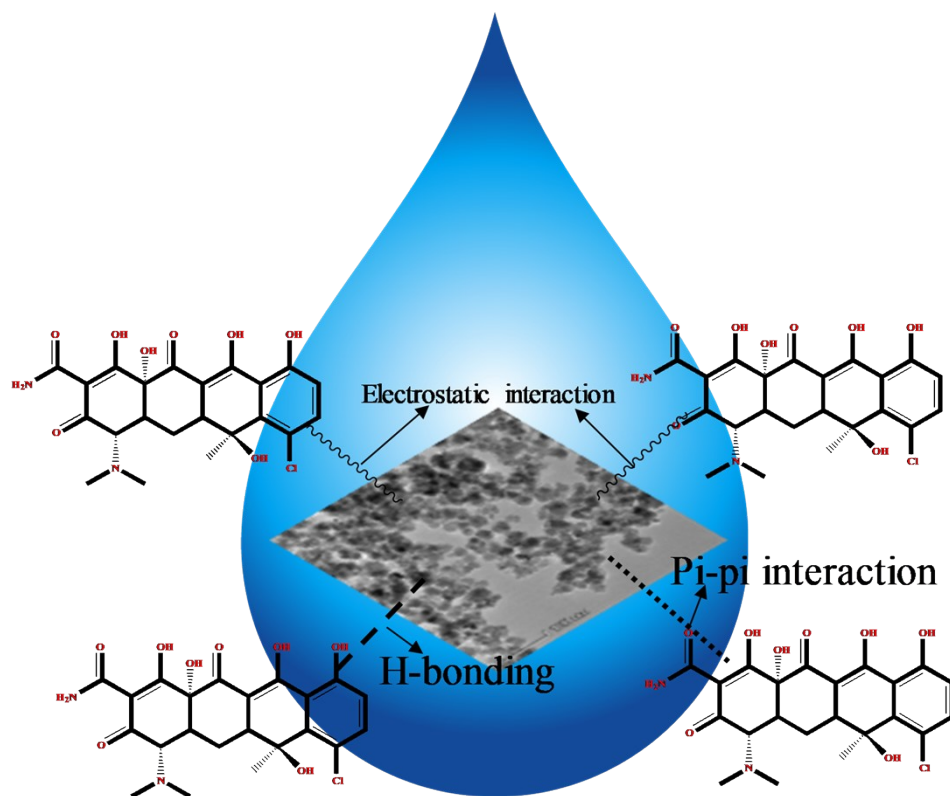

**Fig. S1:** Mechanism of adsorption of TCs on GO/Co-Fe composite

### Adsorption mechanism:

Fig. 10 shows the adsorption mechanism of TCs onto the surface of the GO/Co-Fe composite. The numerous -COOH and -OH groups on the composite's surface create a favourable environment for effective adsorption. The interaction between amino groups (-NH<sub>2</sub>) of TCs and oxygenated functional groups of the GO/Co-Fe composite is facilitated by hydrogen bonding<sup>1</sup>. Moreover, the presence of Fe<sup>3+</sup> and Co<sup>2+</sup> in the GO/Co-Fe composite, which was verified by XPS, enhances adsorption through electrostatic interaction<sup>2</sup>. Additionally, the benzene rings and C=C double bonds of TCs interact with graphene-conjugated basal planes through the  $\pi$ - $\pi$  interactions and finally increase the adsorption capability<sup>1 2</sup>.

Table 1: Table with all treatments (combinations of levels of the factors)

| Experiment       |                 | Factor Level |            |      |                     | Temperature (°C) | Optimum                         |
|------------------|-----------------|--------------|------------|------|---------------------|------------------|---------------------------------|
|                  |                 | Dose (mg)    | Time (min) | pH   | Concentration (ppm) |                  |                                 |
| Adsorption Study | Effect of Dose  | 0.5-12       | 30         | 7    | 0.2                 | 25               | <b>3 mg</b>                     |
|                  | Effect of Time  | 3            | 0.5-20     | 7    | 0.2                 | 25               | <b>0.5 min</b>                  |
|                  | Effect of pH    | 3            | 0.5        | 2-12 | 0.2                 | 25               | <b>pH 7</b>                     |
|                  | Effect of Conc. | 3            | 0.5        | 7    | 0.2                 | 25               | <b>0.2 ppm</b>                  |
| Kinetic study    |                 | 3            | 0.5-90     | 7    | 0.2                 | 25               | Fitted with pseudo second order |
| Isotherm study   |                 | 3            | 0.5        | 7    | 0.2-10              | 30, 40 and 50    | Fitted with Langmuir Isotherm   |

### References:

- 1 B. P. Upoma, S. Yasmin, Md. A. Ali Shaikh, T. Jahan, Md. A. Haque, M. Moniruzzaman and M. H. Kabir, *ACS Omega*, 2022, **7**, 29655–29665.
- 2 H. Zhu, T. Chen, J. Liu and D. Li, *RSC Adv.*, 2018, **8**, 2616–2621.
